# Supplementary material for: Ground and excited state communication within a ruthenium containing benzimidazole metallopolymer
Source: Royal Society of Chemistry journal article supplement (doi:10.1039/c0cp02638g), 2011-01-01
Supplement: c0cp02638g.pdf [file c0cp02638g.pdf]

## Supporting Information -

### Ground and excited state communication within a ruthenium containing benzimidazole metallopolymer

Emmet J. O'Reilly, Lynn Dennany\*<sup>†</sup>, Darren Griffith, Francois Moser, Tia E. Keyes, and Robert J. Forster\*

<sup>†</sup>Centre for Forensic Science, Department of Pure & Applied Chemistry, University of Strathclyde, Royal College, 204 George Street, Glasgow, G1 1XW, Scotland. Fax: +141 548 2532; Tel: +141 548 4322; E-mail: [lynn.dennany@strath.ac.uk](mailto:lynn.dennany@strath.ac.uk)  
National Centre for Sensor Research, School of Chemical Sciences, Dublin City University, Dublin 9, Ireland. Fax: +353 1 7005503; Tel: +353 1 7005943; Email: [Robert.Forster@dcu.ie](mailto:Robert.Forster@dcu.ie)

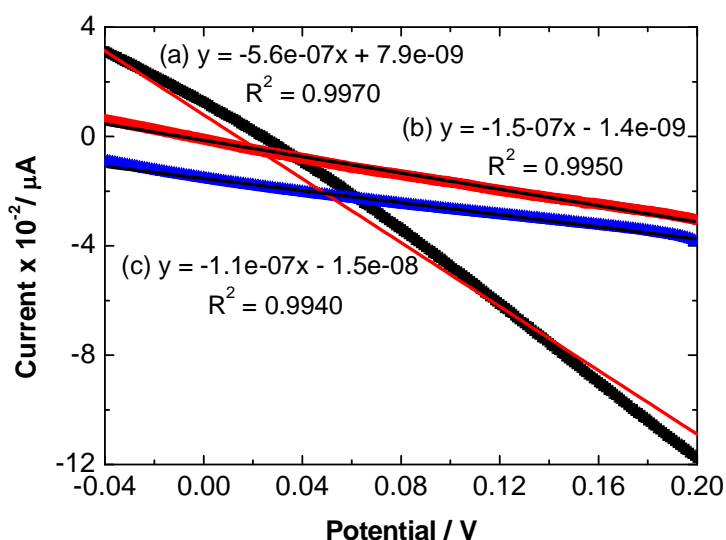

**Figure S1:** Voltammetric response for thin films of  $[\text{Ru}(\text{bpy})_2(\text{PPyBBIM})_n]^{2+}$ , where n is (a) 3, (b) 10 and (c) is 20, cycled over the potential range of -0.04 to 0.20 V, on Interdigitated Array Electrodes. The supporting electrolyte was 0.1 M  $\text{LiClO}_4$ .  $\Gamma = 7 \times 10^{-8} \text{ molcm}^{-2}$ . Analysis was performed at pH 6.0.

**Table S1.**  $D_e$  and Conductivity values for  $[\text{Ru}(\text{bpy})_2(\text{PPyBBIM})_n]^{2+}$  based on data in Figure S2.

| Polymer Loading | $D_e$ ( $\text{cm}^2\text{S}^{-1}$ ) | Conductivity ( $\text{Scm}^{-1}$ ) |
|-----------------|--------------------------------------|------------------------------------|
| 1/3             | $5.23 \pm 0.4 \times 10^{-10}$       | $2.34 \times 10^{-8}$              |
| 1/10            | $4.79 \pm 0.7 \times 10^{-10}$       | $4.44 \times 10^{-9}$              |
| 1/20            | $7.05 \pm 1.0 \times 10^{-11}$       | $5.96 \times 10^{-9}$              |

All values based on averaged results from spectra of 5 analogous samples.

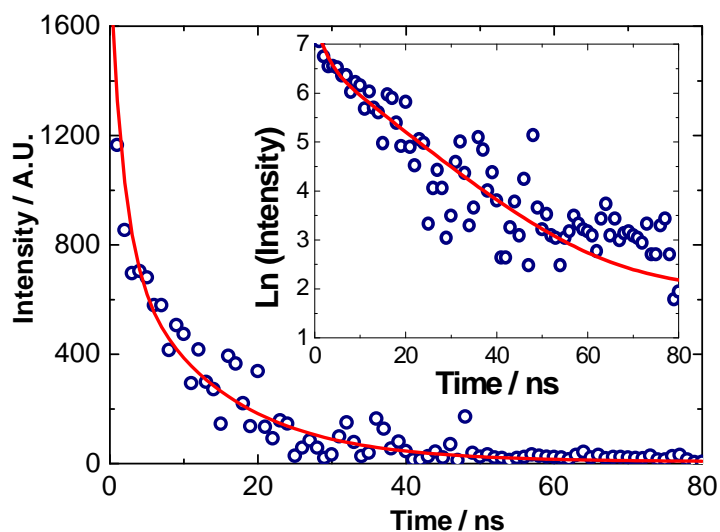

**Figure S2:** Typical transient emission spectra for a 100  $\mu\text{M}$  solution of  $[\text{Ru}(\text{bpy})_2(\text{PPyBBIM})_{10}]^{2+}$  in acetonitrile. An excitation wavelength of 355 nm was utilised. Photon counts of 10,000 were used. The inset shows the natural log of this data. The red line represents the biexponential fitted data.

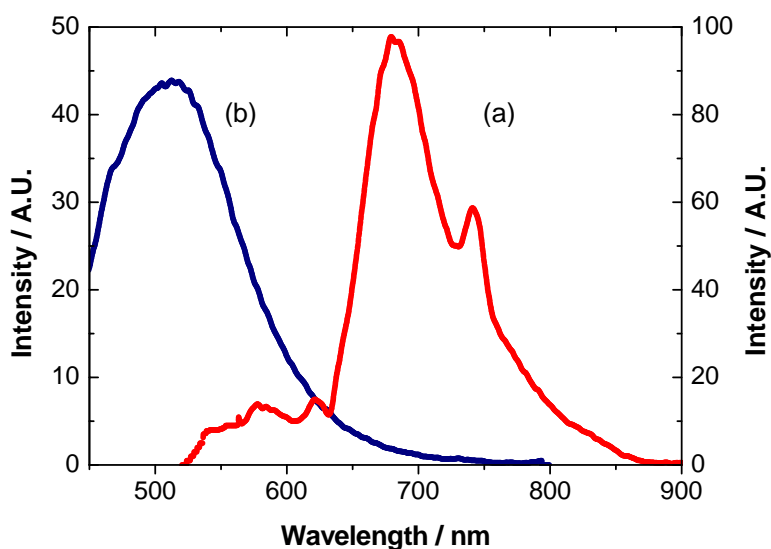

**Figure S3:** Typical emission spectra for a 50  $\mu\text{M}$  solution of  $[\text{Ru}(\text{bpy})_2(\text{PPyBBIM})_{10}]^{2+}$  (a) and 100  $\mu\text{M}$  solution of PPyBBIM (b) in 50:50 MeOH:EtOH degassed solution at 77 K.
